# Supplementary material for: Oriented exchange-coupled L10-FePt/Co core-shell nanoparticles with variable Co thickness
Source: Royal Society of Chemistry journal article supplement (doi:10.1039/d1ra09304e), 2022-01-01
Supplement: d1ra09304e1.pdf [file d1ra09304e1.pdf]

## Magnetic Orientation of Exchange-Coupled L1<sub>0</sub>- FePt/Co Core-Shell Nanoparticles with variable Co Thickness

Xin Liu,<sup>a</sup> Shulan Zuo,<sup>a</sup> Hui wang,<sup>a</sup> Tianli Zhang,<sup>a</sup> Ying Dong<sup>a</sup> and Chengbao Jiang<sup>\*a</sup>

<sup>a</sup>School of Materials Science and Engineering, Beihang University, Beijing 100191, P. R. China.

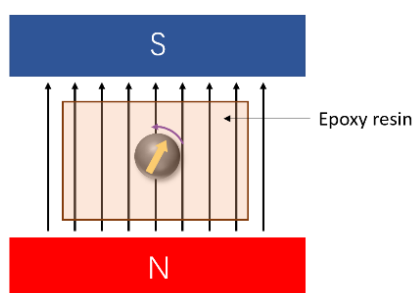

Fig. S1 Diagram of orientation method.

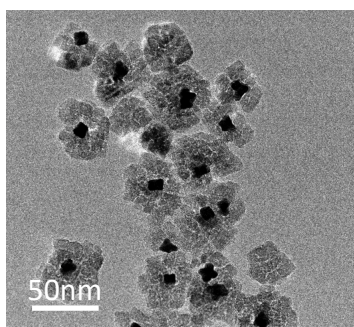

Fig. S2 TEM of MgO coated FePt nanoparticles.

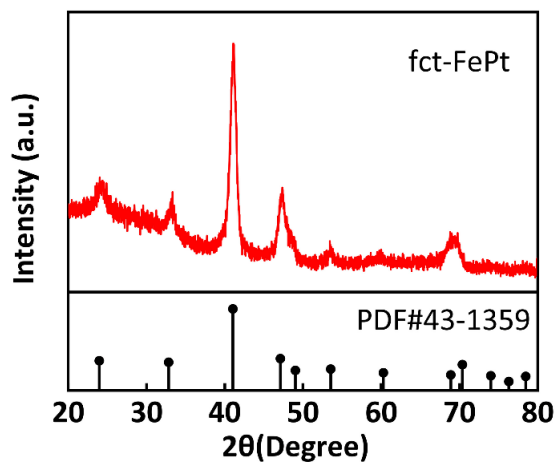

Fig. S3 XRD patterns of L1<sub>0</sub>-FePt nanoparticles.

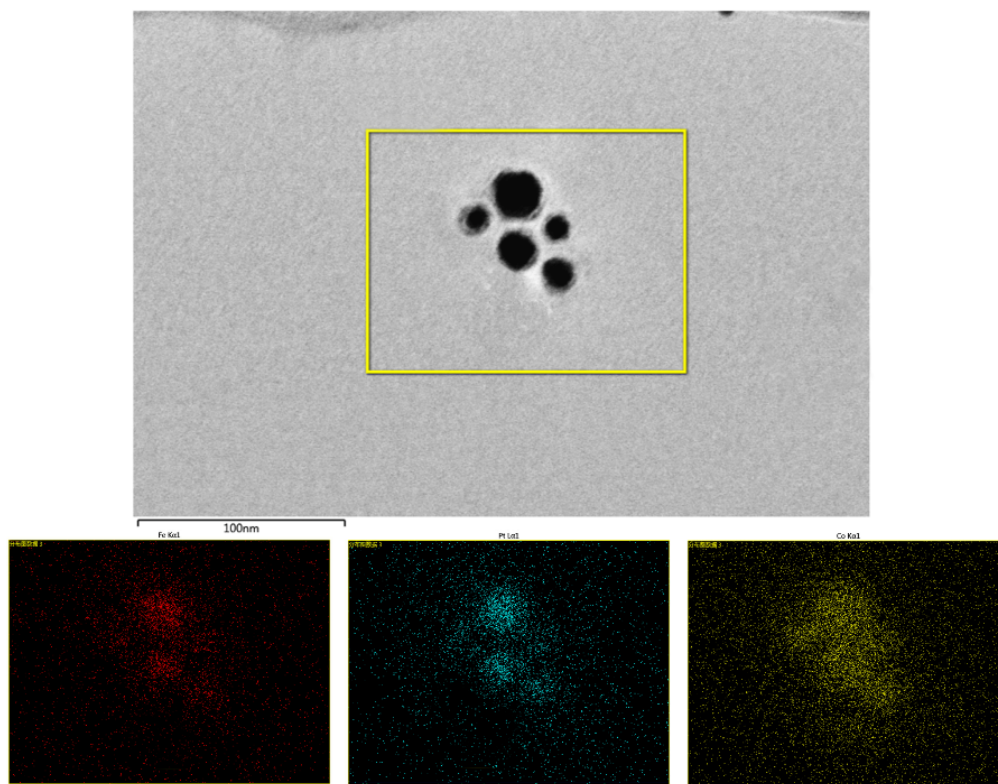

Fig S4 Mapping of FePt/Co nanoparticles with Co thickness of 2.2 nm
